# Supplementary material for: Myocardial toxicity induced by silica nanoparticles in a transcriptome profile
Source: Royal Society of Chemistry journal article supplement (doi:10.1039/d2nr00582d), 2022-01-01
Supplement: d2nr00582d1.pdf [file d2nr00582d1.pdf]

**Table S1. PCR Primer Pairs**

| <b>Gene</b>   | <b>Description</b> | <b>Primer sequence</b>    |
|---------------|--------------------|---------------------------|
| <i>Prkaca</i> | F                  | TTGGACAAGCAGAAGGTGGTGAAG  |
|               | R                  | CCAGGAACGGGAAGTTGACAGC    |
| <i>Chrm1</i>  | F                  | CCGAAGGGCAGCTCTGATGATTG   |
|               | R                  | TGGGTTGGGAGAGGAACTGGATG   |
| <i>Adra1d</i> | F                  | TGGGACCGCTACTAGGTTGGAAG   |
|               | R                  | TAGGTAGAAGGAGCACACGGAAGAG |
| <i>Hrh1</i>   | F                  | GAATACTTGTCGGCGGATCAGTGAG |
|               | R                  | GGCTCTATGCTTGTGTCTGAGTCTG |
| <i>Gna15</i>  | F                  | TGGAGGAGAACAGTCAGGAGAACC  |
|               | R                  | TTGAGGAAGAGGATGACCGAGGTG  |
| <i>Adrb3</i>  | F                  | AGTAGTCCTGGTGTGGATCGTGTC  |
|               | R                  | CGTAGGGCATATTGGAGGCAAAGG  |
| <i>Actb</i>   | F                  | CCCATCTATGAGGGTTACGC      |
|               | R                  | TTTAATGTCACGCACGATTTTC    |
